# Supplementary material
Source: PubMed Central journal article supplement (PMC3938192)
Supplement: NIHMS509240-supplement-1_si_001.pdf [file NIHMS509240-supplement-1_si_001.pdf]

## Supporting Information

### **Structure-guided Inhibitor Design Expands the Scope of Analog-Sensitive Kinase Technology**

Chao Zhang<sup>1, 4, ¶</sup>, Michael S. Lopez<sup>1, ¶</sup>, Arvin C. Dar<sup>1, 5</sup>, Eva LaDow<sup>2</sup>, Steven Finkbeiner<sup>2</sup>, Cai-Hong Yun<sup>3</sup>, Michael J. Eck<sup>3</sup> and Kevan M. Shokat<sup>1, 6\*</sup>

<sup>1</sup>Howard Hughes Medical Institute and Department of Cellular & Molecular Pharmacology, University of California, San Francisco, California 94143, USA

<sup>2</sup>Department of Biological Chemistry and Molecular Pharmacology, Harvard Medical School, Boston, Massachusetts 02115, USA

<sup>3</sup>Gladstone Institute of Neurological Disease, San Francisco, CA 94158

<sup>4</sup>Current Address

Department of Chemistry, University of Southern California, California 90089, USA

<sup>5</sup>Current Address

Departments of Oncological Sciences and Structural and Chemical Biology, Mount Sinai School of Medicine, NY, NY 10029, USA.

<sup>6</sup>Department of Chemistry, University of California, Berkeley, California 94720, USA

## Supplementary Figure and Tables

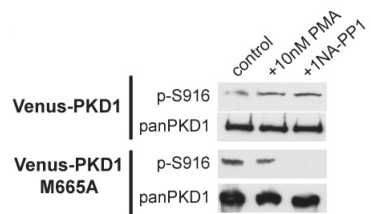

**Supplementary Figure S1.** HEK 293T cells were transfected with Venus-Pkd1-*WT* or Venus-Pkd1-*AS2* and the cells were then treated with DMSO, 10nM PMA or 1µM 1NA-PP1. The cells were lysed and probed for total Pkd1 and p-S916-Pkd1.

| <i>S. Cerevisiae</i> Kinases |       |               |                   |
|------------------------------|-------|---------------|-------------------|
| 26                           |       |               |                   |
| Kinase                       | Ref   | GK            | Inhib.            |
| Pho85                        | 1,2   | F82G          | 5uM 1NA-PP1       |
| Elm1                         | 3     | T200G         | 25uM1NM-PP1       |
| Kin28                        | 4     | L83G          | 6μM 1NA-PP1       |
| Srb10                        | 4     | Y236G         | 24μM 1NA-PP1      |
| Cla4                         | 5     | M640A & T710A | 1NM-PP1           |
| Cdc15                        | 6     | L99G          | 10μM 1NM-PP1      |
| Cdc28                        | 7     | F88G          | 5μM 1NM-PP1       |
| Mps1                         | 8     | M516G         | 10μM1NM-PP1       |
| Ipl1                         | 9     | M181G & T244A | 1NA-PP1           |
| Ime2                         | 10    | M146G         | 20μM 1NA-PP1      |
| Mek1                         | 11,12 | Q247G         | 1μM 1NA-PP1       |
| Ire1                         | 13    | L745G         | 20μM 1NM-PP1      |
| Prk1                         | 14    | M108G & C175A | 40μM 1NA-PP1      |
| Apg1                         | 15    | M102A         | 20μM 1NA-PP1      |
| Cbk1                         | 16,17 | M429A         | 20μ 1NA-PP1       |
| Hog1                         | 18,19 | T100G         | 12μM 1NM-PP1      |
| Fus3                         | 7     | Q93G          | 5μM 1NM-PP1       |
| Tpk1                         | 20-25 | M164G         | 1μM 1NM-PP1       |
| Tpk2                         | 23-25 | M147G         | 1μM 1NM-PP1       |
| Tpk3                         | 23-25 | M165G         | 1μM 1NM-PP1       |
| Sch9                         | 24,25 | T492G         | 0.1 1NM-PP1       |
| Tos3                         | 26    | L135G         | 2.5μM 2,3-dMB-PP1 |
| Cdc7                         | 27    | L120A & V181A | 15μM PP1          |
| Cdc5                         | 28,29 | L158G, C96V   | CMK               |
| Snf1                         | 30,31 | I132G         | 10 μM 2NM-PP1     |
| Bur1                         | 32    | L149G         | 6μM 3MB-PP1       |

| <i>S. Pombe</i> Kinases |                  |             |               |
|-------------------------|------------------|-------------|---------------|
| 15                      |                  |             |               |
| Kinase                  | Ref              | GK          | Inhib.        |
| Hhp1                    | <sup>33</sup>    | M84G        | 1NM-PP1       |
| Cdc2                    | <sup>33</sup>    | F84G        | 0.5μM 1NM-PP1 |
| Cdk9                    | <sup>33</sup>    | T120G       | 10μM1NM-PP1   |
| Cka1                    | <sup>33</sup>    | F117G       | 5μM 9Ch-ANPUR |
| Crk1                    | <sup>33</sup>    | L87G        | 30μM 3BrB-PP1 |
| Ksg1                    | <sup>33</sup>    | L177G       | 5μM 1NM-PP1   |
| Nak1                    | <sup>33</sup>    | M77G        | 40μM 3BrB-PP1 |
| Orb6                    | <sup>33</sup>    | M170G       | 5μM 3BrB-PP1  |
| Pat1                    | <sup>33</sup>    | L95A        | 10μM 1NM-PP1  |
| Plo1                    | <sup>33</sup>    | L117G       | 10μM 3BrB-PP1 |
| Ppk37                   | <sup>33</sup>    | M537G       | 30μM 1NM-PP1  |
| Prp4                    | <sup>33</sup>    | F238A       | 30μM 3BrB-PP1 |
| Shk1                    | <sup>33</sup>    | M460A       | 20μM 3BrB-PP1 |
| Sid2                    | <sup>33</sup>    | M285G       | 40μM 3BrB-PP1 |
| Ark1                    | <sup>33,34</sup> | L166A S229A | 5μM 1NM-PP1   |

| Mammalian Tyr Kinases |               |                   |                    |            |
|-----------------------|---------------|-------------------|--------------------|------------|
| 18                    |               |                   |                    |            |
| Kinase                | Ref           | GK                | Conc. Used $\mu$ M | Inhib.     |
| v-Src                 | <sup>35</sup> | I338G             | 0.25               | 1NA-PP1    |
| CSK                   | <sup>36</sup> | T266G             | 10                 | 3IB-PP1    |
| Fyn                   | <sup>7</sup>  | T339G             | 0.005 (in vitro)   | 1NA-PP1    |
| Lck                   | <sup>37</sup> | T316G             | 10                 | 1NA-PP1    |
| TrkA                  | <sup>38</sup> | F592A             | 0.1                | 1NM-PP1    |
| TrkB                  | <sup>38</sup> | F616A             | 0.1                | 1NM-PP1    |
| TrkC                  | <sup>38</sup> | F617A             | 0.1                | 1NM-PP1    |
| Bcr-Abl               | <sup>39</sup> | T316A             | 2                  | 1NA-PP1    |
| v-ErbB                | <sup>40</sup> | T210A             | 2                  | 1NA-PP1    |
| Jak1                  | <sup>41</sup> | M956G             | 40                 | 1NM-PP1    |
| Jak3                  | <sup>41</sup> | M902G             | 40                 | 1NM-PP1    |
| Zap70                 | <sup>42</sup> | M414A C405V       | 10                 | 3MB-PP1    |
| Syk                   | <sup>43</sup> | M442A M429L R428Q | 6                  | 2,3DMB-PP1 |
| EphB1                 | <sup>44</sup> | T697G             | 0.25               | 1NA-PP1    |
| EphB2                 | <sup>44</sup> | T699A             | 0.25               | 1NA-PP1    |
| EphB3                 | <sup>44</sup> | T706A             | 0.25               | 1NA-PP1    |
| Ret                   | <sup>45</sup> | V805A             | 0.1                | 1NA-PP1    |
| Yes                   | <sup>46</sup> | T346G             | 10                 | 1NM-PP1    |

| Mammalian Ser/Thr Kinases |                  |                     |                                |                |
|---------------------------|------------------|---------------------|--------------------------------|----------------|
| 21                        |                  |                     |                                |                |
| Kinase                    | Ref              | GK                  | Conc. used in cells ( $\mu$ M) | Inhib.         |
| Cdk1                      | 47               | F80G                | 0.6                            | 1NM-PP1        |
| Cdk2                      | 48               | F80G                | 10                             | 3MB-PP1        |
| Cdk7                      | 49               | F91G                | 5                              | 3MB-PP1        |
| PKA $\alpha$              | 50               | M120A               | 10                             | 1NM-PP1        |
| PKA $\beta$               | 50               | M120G & K46I        | 10                             | 1NM-PP1        |
| PKC $\epsilon$            | 51               | M486A               | 1                              | 1NA-PP1        |
| GRK2                      | 28,52            | L271G & C221V       | 2.5                            | 1NA-PP1        |
| JNK1                      | 53               | M108G & L168A       | 1                              | 1NM-PP1        |
| JNK2                      | 54               | M108G               | 10                             | 1NM-PP1        |
| CaMIK $\alpha$            | 55,56            | F89G                | 5                              | 1NM-PP1        |
| Irel $\alpha$             | 57               | I642G               | 5                              | 1NM-PP1        |
| Plk1                      | 58,59            | C67V & L130G        | 10                             | 3MB-PP1        |
| Mps1                      | 60,61            | M602A               | 5                              | 3MB-PP1        |
| Lkb                       | 62               | M129G               | 10                             | 1NM-PP1        |
| Akt1                      | 63,64            | M227G               | 2.5                            | 3IB-PP1, PrIDZ |
| Akt2                      | 63,64            | M225G               | 2.5                            | PrIDZ          |
| Akt3                      | 63,64            | M229G               | 2.5                            | PrIDZ          |
| Pdk1                      | 65               | L159G               | 2                              | Cpac-BX        |
| Mekk1                     | 28               | I1304G, C1238V      | N.D.                           | N.D.           |
| Pkd1                      | This Publication | M665A               | 1                              | 1NA-PP1        |
| Aurora B                  | 66               | L154G, H250Y        | 2                              | 1NA-PP1        |
| NDR                       | 67               | M166A, M152L, S229A | 1                              | 1NA-PP1        |

| <b>Plant Kinases</b> |                  |                     |                               |
|----------------------|------------------|---------------------|-------------------------------|
| <b>3</b>             |                  |                     |                               |
| <b>Kinase</b>        | <b>Ref</b>       | <b>GK</b>           | <b>Inhib.</b>                 |
| MPK4                 | <sup>68</sup>    | Y124G               | 100μM 1NA-PP1                 |
| Pto                  | <sup>28,69</sup> | Y114A, <b>L681I</b> | 10μM 1NM-PP1<br>10 μM 3MB-PP1 |
| LeMPK3               | <sup>70</sup>    | T123A               | 1μM Bn-PP1(in vitro)          |

| <b><i>C. Elegans</i></b> |               |           |               |
|--------------------------|---------------|-----------|---------------|
| <b>1</b>                 |               |           |               |
| <b>Kinase</b>            | <b>Ref</b>    | <b>GK</b> | <b>Inhib.</b> |
| Sad1                     | <sup>71</sup> | L123A     | 33μM 1NA-PP1  |

**Supplementary Table S1.** Analog-sensitive kinases reported in peer-reviewed publications. Information listed includes the kinase, associated references (Ref), gatekeeper mutation (GK), suppressor mutations in red, inhibitor sensitizing mutations in green, and the concentration and identity of inhibitor used in publication (Inhib).

**Legend**

|                      |
|----------------------|
| < 40% Inhibition     |
| 40% - 80% Inhibition |
| ≥ 80% Inhibition     |

|               |          |                 | <u>Conc. (nM)</u> |        |        |              |               |
|---------------|----------|-----------------|-------------------|--------|--------|--------------|---------------|
|               |          | <u>Compound</u> | 1000              | 1000   | 1000   | 1000         | 1000          |
|               |          |                 | 1NAPP1            | 1NMPP1 | 3MBPP1 | 3IB-PP1 (17) | 3MSB-PP1 (18) |
| ABL1          | Activity | Km app          | 26                | 14     | 16     | -6           | -10           |
| ABL1 E255K    | Activity | Km app          | 24                | 14     | 17     | 8            | 8             |
| ABL1 G250E    | Activity | Km app          | 18                | 9      | 13     | 24           | 19            |
| ABL1 T315I    | Activity | Km app          | 8                 | 5      | 8      | -2           | -2            |
| ABL1 Y253F    | Activity | Km app          | 29                | 14     | 18     | 19           | 13            |
| ABL2 (Arg)    | Activity | Km app          | 19                | 16     | 13     | 5            | 3             |
| ACVR1 (ALK2)  | Binding  |                 |                   |        |        | 20           | 13            |
| ACVR1B (ALK4) | Activity | Km app          | 65                | -3     | 5      | 25           | 9             |



|                      |                |        |     |     |    |     |     |  |
|----------------------|----------------|--------|-----|-----|----|-----|-----|--|
| <b>ACVR2B</b>        | <b>Binding</b> |        |     |     |    |     |     |  |
| ADRBK1 (GRK2)        | Activity       | Km app | 3   | 3   | -1 | 12  | 9   |  |
| ADRBK2 (GRK3)        | Activity       | Km app | 6   | -3  | -6 | 3   | 3   |  |
| AKT1 (PKB alpha)     | Activity       | Km app | 0   | 2   | -1 | -6  | -6  |  |
| AKT2 (PKB beta)      | Activity       | Km app | -1  | -2  | 0  | 6   | 6   |  |
| AKT3 (PKB gamma)     | Activity       | Km app | 9   | 1   | 1  | 2   | 1   |  |
| ALK                  | Activity       | Km app | 1   | 3   | -1 | 5   | 8   |  |
| AMPK A1/B1/G1        | Activity       | Km app | 2   | 1   | -2 | -18 | -1  |  |
| AMPK A2/B1/G1        | Activity       | Km app | 9   | 4   | 8  | 10  | 12  |  |
| AURKA (Aurora A)     | Activity       | Km app | 6   | 0   | 4  | 0   | -2  |  |
| AURKB (Aurora B)     | Activity       | Km app | 5   | 7   | 3  | 5   | 8   |  |
| AURKC (Aurora C)     | Activity       | Km app | 6   | 2   | 6  | -10 | -12 |  |
| AXL                  | Activity       | Km app | 4   | 2   | 3  | 2   | -1  |  |
| BLK                  | Activity       | Km app | 38  | 16  | 15 | 12  | 11  |  |
| <b>BMPR1A (ALK3)</b> | <b>Binding</b> |        |     |     |    |     |     |  |
| BMX                  | Activity       | Km app | 26  | 52  | 25 | 41  | 47  |  |
| <b>BRAF</b>          | <b>Binding</b> |        |     |     |    | 14  | 12  |  |
| BRAF                 | Activity       | 100    | 29  | 19  | 26 | 8   | 11  |  |
| <b>BRAF V599E</b>    | <b>Binding</b> |        |     |     |    | 9   | 2   |  |
| BRAF V599E           | Activity       | 100    | 17  | 9   | 32 | 12  | 11  |  |
| BRSK1 (SAD1)         | Activity       | Km app | 9   | 8   | 7  | 2   | 1   |  |
| BTK                  | Activity       | Km app | 49  | 61  | 39 | 19  | 20  |  |
| CAMK1 (CaMK1)        | Activity       | 10     | -16 | -20 | 12 | -17 | -21 |  |
| CAMK1 (CaMK1)        | Activity       | 100    |     |     |    |     |     |  |
| CAMK1D (CaMKI delta) | Activity       | Km app | -2  | -5  | -5 | -1  | 3   |  |

|                       |          |        |    |     |     |    |    |
|-----------------------|----------|--------|----|-----|-----|----|----|
| CAMK2A (CaMKII alpha) | Activity | Km app | 2  | 1   | -3  | 12 | 14 |
| CAMK2B (CaMKII beta)  | Activity | Km app | 14 | 15  | 9   | 19 | 21 |
| CAMK2D (CaMKII delta) | Activity | Km app | 4  | 0   | -2  | 15 | 15 |
| CAMK4 (CaMKIV)        | Activity | Km app | -6 | 10  | -5  | -2 | -1 |
| CAMKK1 (CAMKKA)       | Binding  |        |    |     |     | 9  | 6  |
| CAMKK2 (CaMKK beta)   | Binding  |        |    |     |     | 1  | 1  |
| CDC42 BPA (MRCKA)     | Activity | Km app | -2 | -2  | 5   | 6  | 4  |
| CDC42 BPB (MRCKB)     | Activity | Km app | 9  | 2   | 3   | 2  | 2  |
| CDK1/cyclin B         | Activity | Km app | 2  | 2   | 3   | 8  | 10 |
| CDK2/cyclin A         | Activity | Km app | 8  | 9   | 11  | 2  | 1  |
| CDK5/p25              | Activity | Km app | 2  | 2   | 3   | 6  | 7  |
| CDK5/p35              | Activity | Km app | 0  | -2  | 2   | 10 | 16 |
| CDK7/cyclin H/MNAT1   | Activity | Km app | -5 | 14  | -15 | 12 | 8  |
| CDK8/cyclin C         | Binding  |        |    |     |     | 12 | 16 |
| CDK9/cyclin K         | Binding  |        |    |     |     | 4  | 3  |
| CDK9/cyclin T1        | Activity | Km app | 3  | -2  | -4  | 4  | 8  |
| CHEK1 (CHK1)          | Activity | Km app | 3  | 6   | 4   | -6 | -6 |
| CHEK2 (CHK2)          | Activity | Km app | 12 | 7   | 9   | -3 | -3 |
| CHUK (IKK alpha)      | Activity | 10     | 4  | -20 | -12 |    |    |
| CHUK (IKK alpha)      | Activity | Km app |    |     |     | 3  | -1 |
| CLK1                  | Activity | Km app | 7  | 7   | 7   | 13 | 12 |
| CLK2                  | Activity | Km app | 10 | 10  | 14  | 32 | 38 |
| CLK3                  | Activity | Km app | 4  | 7   | 6   | 1  | 5  |
| CLK4                  | Binding  |        |    |     |     |    |    |
| CSF1R (FMS)           | Activity | Km     | 40 | 28  | 20  | 30 | 19 |

|                       |          |        |    |    |    |     |     |
|-----------------------|----------|--------|----|----|----|-----|-----|
|                       |          | app    |    |    |    |     |     |
| CSK                   | Activity | Km app | 28 | 29 | 17 | 28  | 27  |
| CSNK1A1 (CK1 alpha 1) | Activity | Km app | 12 | 1  | 13 | 18  | 17  |
| CSNK1D (CK1 delta)    | Activity | Km app | 38 | 14 | 70 | 90  | 89  |
| CSNK1E (CK1 epsilon)  | Activity | Km app | 91 | 96 | 85 | 100 | 100 |
| CSNK1G1 (CK1 gamma 1) | Activity | Km app | 0  | 2  | -2 | 6   | 3   |
| CSNK1G2 (CK1 gamma 2) | Activity | Km app | -2 | -1 | -2 | 14  | 11  |
| CSNK1G3 (CK1 gamma 3) | Activity | Km app | 0  | 2  | 2  | 6   | 4   |
| CSNK2A1 (CK2 alpha 1) | Activity | Km app | 6  | 7  | 3  | 5   | 5   |
| CSNK2A2 (CK2 alpha 2) | Activity | Km app | 4  | 3  | 1  | 4   | 3   |
| DAPK1                 | Activity | Km app | -3 | 12 | 3  | 2   | -1  |
| DAPK3 (ZIPK)          | Activity | Km app | 0  | 2  | -1 | 2   | -3  |
| DCAMKL2 (DCK2)        | Activity | Km app | 2  | 1  | -1 | 7   | 9   |
| DDR1                  | Binding  |        |    |    |    |     |     |
| DDR2                  | Binding  |        |    |    |    | 6   | 4   |
| DMPK                  | Binding  |        |    |    |    | 6   | 7   |
| DNA-PK                | Activity | Km app |    |    |    |     |     |
| DYRK1A                | Activity | Km app | 4  | 2  | 3  | -3  | -4  |
| DYRK1B                | Activity | Km app | 12 | 11 | 10 | -10 | -9  |
| DYRK3                 | Activity | Km app | 0  | 2  | 0  | 3   | 3   |
| DYRK4                 | Activity | Km app | 2  | 2  | 1  | 1   | 2   |
| EEF2K                 | Activity | Km app | 2  | 3  | 1  | 20  | 18  |
| EGFR (ErbB1)          | Activity | Km app | 28 | 24 | 36 | 56  | 65  |
| EGFR (ErbB1) L858R    | Activity | Km app | 40 | 29 | 34 | 48  | 27  |

|                          |          |        |    |    |    |    |    |
|--------------------------|----------|--------|----|----|----|----|----|
| EGFR (ErbB1) L861Q       | Activity | Km app | 34 | 17 | 30 | 34 | 20 |
| EGFR (ErbB1) T790M       | Activity | Km app | 48 | 38 | 44 | 66 | 81 |
| EGFR (ErbB1) T790M L858R | Activity | Km app | 65 | 53 | 56 | 66 | 55 |
| EPHA1                    | Activity | Km app | 93 | 83 | 71 | 48 | 47 |
| EPHA2                    | Activity | Km app | 75 | 43 | 44 | 22 | 13 |
| EPHA3                    | Binding  |        |    |    |    |    |    |
| EPHA3                    | Activity | Km app | 45 | 18 | 21 | 12 | 4  |
| EPHA4                    | Activity | Km app | 83 | 43 | 46 | 36 | 25 |
| EPHA5                    | Activity | Km app | 86 | 56 | 61 | 40 | 21 |
| EPHA7                    | Binding  |        |    |    |    | 6  | 8  |
| EPHA8                    | Activity | Km app | 67 | 51 | 40 | 39 | 24 |
| EPHB1                    | Activity | Km app | 63 | 44 | 43 | 34 | 27 |
| EPHB2                    | Activity | Km app | 78 | 58 | 58 | 38 | 25 |
| EPHB3                    | Activity | Km app | 48 | 35 | 52 | 31 | 14 |
| EPHB4                    | Activity | Km app | 73 | 62 | 63 | 45 | 25 |
| ERBB2 (HER2)             | Activity | Km app | 9  | 19 | 25 | 21 | 32 |
| ERBB4 (HER4)             | Activity | Km app | 10 | 38 | 35 | 63 | 85 |
| FER                      | Activity | Km app | 29 | 24 | 15 | 12 | 15 |
| FES (FPS)                | Activity | Km app | 20 | 13 | 4  | 15 | 15 |
| FGFR1                    | Activity | Km app | 13 | 8  | 17 | 7  | 7  |
| FGFR2                    | Activity | Km app | 16 | 10 | 12 | 11 | 9  |
| FGFR3                    | Activity | Km app | 1  | 4  | -3 | 14 | 15 |
| FGFR3 K650E              | Activity | Km app | 5  | 2  | 4  | 25 | 22 |

|                    |          |        |     |    |     |    |    |
|--------------------|----------|--------|-----|----|-----|----|----|
| FGFR4              | Activity | Km app | 14  | -2 | 5   | 20 | 15 |
| FGR                | Activity | Km app | 71  | 42 | 55  | 52 | 33 |
| FLT1 (VEGFR1)      | Activity | Km app | 5   | 5  | 4   | 10 | 9  |
| FLT3               | Activity | Km app | 13  | 12 | 20  | 28 | 35 |
| FLT3 D835Y         | Activity | Km app | 16  | 14 | -2  | 1  | 13 |
| FLT4 (VEGFR3)      | Activity | Km app | 9   | 8  | 20  | 21 | 17 |
| FRAP1 (mTOR)       | Activity | Km app | 0   | 0  | -3  | 6  | -5 |
| FRK (PTK5)         | Activity | Km app | 89  | 47 | 74  | 60 | 33 |
| FYN                | Activity | Km app | 45  | 37 | 32  | 37 | 39 |
| GRK4               | Activity | Km app | -10 | -9 | -12 | -3 | -5 |
| GRK5               | Activity | Km app | -4  | 1  | -5  | 4  | 3  |
| GRK6               | Activity | Km app | -5  | -4 | -6  | 1  | -1 |
| GRK7               | Activity | Km app | -4  | -6 | -6  | -2 | -3 |
| GSG2 (Haspin)      | Activity | Km app |     |    |     | 28 | 49 |
| GSK3A (GSK3 alpha) | Activity | Km app | 5   | 6  | 2   | 9  | 11 |
| GSK3B (GSK3 beta)  | Activity | Km app | 4   | 5  | 7   | -3 | -3 |
| HCK                | Activity | Km app | 59  | 31 | 31  | 17 | 11 |
| HIPK1 (Myak)       | Activity | Km app | 1   | 0  | -1  | 5  | 5  |
| HIPK2              | Activity | Km app |     |    |     | 4  | 5  |
| HIPK3 (YAK1)       | Activity | Km app |     |    |     |    |    |
| HIPK4              | Activity | Km app | 9   | 9  | 8   | 12 | 10 |
| IGF1R              | Activity | Km app | 4   | 7  | 2   | 11 | 10 |
| IKBKB (IKK beta)   | Activity | Km     | 4   | 5  | 4   | 5  | 6  |

|                     |          |     |    |    |    |     |     |  |
|---------------------|----------|-----|----|----|----|-----|-----|--|
|                     |          | app |    |    |    |     |     |  |
|                     |          | Km  |    |    |    |     |     |  |
| IKBKE (IKK epsilon) | Activity | app | 1  | -2 | -4 | -1  | -6  |  |
| INSR                | Activity | app | 7  | 6  | 4  | 4   | 4   |  |
| INSRR (IRR)         | Activity | app | -6 | -5 | -6 | 24  | 21  |  |
| IRAK1               | Activity | app |    |    |    | 7   | 11  |  |
| IRAK4               | Activity | app | 5  | 2  | 4  | -3  | -2  |  |
| ITK                 | Activity | app | 6  | 4  | 3  | 6   | 4   |  |
| JAK1                | Activity | app | 0  | -6 | -3 | 5   | 3   |  |
| JAK2                | Activity | app | -2 | -1 | 4  | -8  | -10 |  |
| JAK2 JH1 JH2        | Activity | app | 3  | 4  | 4  | -3  | -2  |  |
| JAK2 JH1 JH2 V617F  | Activity | app | -6 | -5 | -7 | 7   | 6   |  |
| JAK3                | Activity | app | -6 | -6 | -5 | 3   | 8   |  |
| KDR (VEGFR2)        | Activity | app | 24 | 21 | 41 | 25  | 21  |  |
| KIT                 | Activity | app | 38 | 24 | 21 | -4  | -5  |  |
| KIT T670I           | Activity | app | 7  | 5  | 10 | -2  | -1  |  |
| KIT V654A           | Binding  | app |    |    |    | 3   | 6   |  |
| LCK                 | Activity | app | 52 | 35 | 36 | 24  | 20  |  |
| LIMK1               | Binding  | app |    |    |    | 0   | -5  |  |
| LIMK2               | Binding  | app |    |    |    | -3  | 1   |  |
| LRRK2               | Activity | app | 13 | -7 | 5  | -13 | 3   |  |
| LRRK2 G2019S        | Activity | app | 19 | 10 | 1  | 4   | 8   |  |
| LTK (TYK1)          | Activity | app | -2 | 1  | -2 | 0   | 1   |  |
| LYN A               | Activity | app | 82 | 55 | 59 | 49  | 39  |  |
| LYN B               | Activity | app | 81 | 55 | 55 | 43  | 33  |  |

|                              |          |        |    |    |    |     |     |
|------------------------------|----------|--------|----|----|----|-----|-----|
| MAP2K1 (MEK1)                | Binding  |        |    |    | 22 | 38  |     |
| MAP2K1 (MEK1)                | Activity | 100    | 5  | 15 | 9  | 1   | 4   |
| MAP2K1 (MEK1) S218D S222D    | Binding  |        |    |    | 18 | 28  |     |
| MAP2K2 (MEK2)                | Binding  |        |    |    | 12 | 21  |     |
| MAP2K2 (MEK2)                | Activity | 100    | 14 | 8  | 8  | -4  | 0   |
| MAP2K3 (MEK3)                | Binding  |        |    |    | 16 | 14  |     |
| MAP2K6 (MKK6)                | Binding  |        |    |    | 7  | 10  |     |
| MAP2K6 (MKK6)                | Activity | 100    | 4  | 4  | 3  | -11 | -16 |
| MAP2K6 (MKK6) S207E T211E    | Binding  |        |    |    | 17 | 9   |     |
| MAP3K10 (MLK2)               | Binding  |        |    |    | 11 | 13  |     |
| MAP3K11 (MLK3)               | Binding  |        |    |    | 0  | 1   |     |
| MAP3K14 (NIK)                | Binding  |        |    |    | -1 | -2  |     |
| MAP3K2 (MEKK2)               | Binding  |        |    |    | 31 | 15  |     |
| MAP3K3 (MEKK3)               | Binding  |        |    |    | 62 | 35  |     |
| MAP3K5 (ASK1)                | Binding  |        |    |    | 6  | 5   |     |
| MAP3K7/MAP3K7IP1 (TAK1-TAB1) | Binding  |        |    |    | 2  | 4   |     |
| MAP3K8 (COT)                 | Activity | 100    | 14 | 10 | 12 | 26  | 22  |
| MAP3K9 (MLK1)                | Activity | Km app | 1  | 3  | 0  | -6  | 0   |
| MAP4K2 (GCK)                 | Activity | Km app | 7  | 2  | 4  | 4   | 6   |
| MAP4K4 (HGK)                 | Activity | Km app | 92 | 56 | 28 | 8   | 1   |
| MAP4K5 (KHS1)                | Activity | Km app | 69 | 31 | 38 | 26  | 30  |
| MAPK1 (ERK2)                 | Activity | Km app | 4  | 6  | 3  | 2   | 0   |
| MAPK10 (JNK3)                | Binding  |        |    |    | 21 | 18  |     |
| MAPK10 (JNK3)                | Activity | 100    | 4  | 5  | 6  | -6  | -7  |
| MAPK11 (p38 beta)            | Activity | Km app | 12 | 15 | 16 | 14  | 15  |
| MAPK12 (p38 gamma)           | Activity | Km app | 1  | 2  | 2  | 6   | 8   |
| MAPK13 (p38 delta)           | Activity | Km app | 2  | 3  | 4  | 11  | 11  |
| MAPK14 (p38 alpha)           | Activity | 100    | 15 | 26 | 24 | 7   | 12  |

|                           |          |        |           |     |    |    |     |
|---------------------------|----------|--------|-----------|-----|----|----|-----|
| MAPK14 (p38 alpha) Direct | Activity | Km app | [Hatched] |     |    | -1 | -1  |
| MAPK3 (ERK1)              | Activity | Km app | 6         | 4   | 5  | 9  | 7   |
| MAPK8 (JNK1)              | Binding  |        | [Hatched] |     |    | 1  | 3   |
| MAPK8 (JNK1)              | Activity | 100    | -7        | -11 | -5 | -7 | 3   |
| MAPK9 (JNK2)              | Binding  |        | [Hatched] |     |    | 15 | 18  |
| MAPK9 (JNK2)              | Activity | 100    | 0         | 6   | 4  | 9  | 3   |
| MAPKAPK2                  | Activity | Km app | -2        | 0   | -1 | -6 | -6  |
| MAPKAPK3                  | Activity | Km app | 2         | -1  | 3  | -1 | -1  |
| MAPKAPK5 (PRAK)           | Activity | Km app | -2        | 0   | 0  | 1  | 1   |
| MARK1 (MARK)              | Activity | Km app | 6         | 4   | 3  | 10 | 10  |
| MARK2                     | Activity | Km app | 11        | 8   | 7  | 14 | 13  |
| MARK3                     | Activity | Km app | [Hatched] |     |    | 1  | -12 |
| MARK4                     | Activity | Km app | [Hatched] |     |    | -2 | -1  |
| MATK (HYL)                | Activity | Km app | -2        | 0   | -3 | 13 | 10  |
| MELK                      | Activity | Km app | 21        | 17  | 16 | 16 | 16  |
| MERTK (cMER)              | Activity | Km app | 5         | 5   | 7  | 21 | 19  |
| MET (cMet)                | Activity | Km app | -2        | -1  | 0  | 3  | 3   |
| MET M1250T                | Activity | Km app | -2        | -5  | -4 | 3  | 3   |
| MINK1                     | Activity | Km app | 89        | 52  | 37 | 40 | 28  |
| MKNK1 (MNK1)              | Activity | Km app | [Hatched] |     |    |    |     |
| MKNK2 (MNK2)              | Binding  |        | [Hatched] |     |    |    |     |
| MLCK (MLCK2)              | Binding  |        | [Hatched] |     |    | 6  | 4   |
| MST1R (RON)               | Activity | Km app | 2         | 2   | 3  | -2 | -2  |
| MST4                      | Activity | Km app | 25        | 13  | 13 | 1  | 3   |
| MUSK                      | Activity | Km     | -3        | 2   | -2 | 28 | 29  |



|                      |                |     |    |    |    |    |    |    |
|----------------------|----------------|-----|----|----|----|----|----|----|
|                      |                | app |    |    |    |    |    |    |
| <b>MYLK (MLCK)</b>   | <b>Binding</b> |     |    |    |    |    | 2  | 1  |
|                      |                | Km  |    |    |    |    |    |    |
| MYLK2 (skMLCK)       | Activity       | app | 0  | 5  | -2 | -3 | 3  |    |
|                      |                | Km  |    |    |    |    |    |    |
| NEK1                 | Activity       | app | 9  | 8  | 10 | -8 | 1  |    |
|                      |                | Km  |    |    |    |    |    |    |
| NEK2                 | Activity       | app | 8  | 6  | 9  | 5  | 3  |    |
|                      |                | Km  |    |    |    |    |    |    |
| NEK4                 | Activity       | app | 3  | 3  | 3  | 8  | 5  |    |
|                      |                | Km  |    |    |    |    |    |    |
| NEK6                 | Activity       | app | 8  | 3  | 0  | 3  | 3  |    |
|                      |                | Km  |    |    |    |    |    |    |
| NEK7                 | Activity       | app | 3  | 4  | -1 | 24 | 25 |    |
|                      |                | Km  |    |    |    |    |    |    |
| NEK9                 | Activity       | app | -6 | -5 | -8 | 2  | 2  |    |
|                      |                | Km  |    |    |    |    |    |    |
| <b>NLK</b>           | <b>Binding</b> |     |    |    |    |    | 34 | 20 |
|                      |                | Km  |    |    |    |    |    |    |
| NTRK1 (TRKA)         | Activity       | app | 4  | 10 | 16 | 40 | 33 |    |
|                      |                | Km  |    |    |    |    |    |    |
| NTRK2 (TRKB)         | Activity       | app | 6  | 10 | 46 | 63 | 62 |    |
|                      |                | Km  |    |    |    |    |    |    |
| NTRK3 (TRKC)         | Activity       | app | 20 | 12 | 34 | 66 | 66 |    |
|                      |                | Km  |    |    |    |    |    |    |
| NUAK1 (ARK5)         | Activity       | app |    |    |    | 3  | 10 |    |
|                      |                | Km  |    |    |    |    |    |    |
| PAK1                 | Activity       | app |    |    |    | 20 | 26 |    |
|                      |                | Km  |    |    |    |    |    |    |
| PAK2 (PAK65)         | Activity       | app | -3 | 11 | 9  | 6  | 5  |    |
|                      |                | Km  |    |    |    |    |    |    |
| PAK3                 | Activity       | app | 7  | 7  | 3  | 11 | 3  |    |
|                      |                | Km  |    |    |    |    |    |    |
| PAK4                 | Activity       | app | 16 | 1  | 17 | 2  | 9  |    |
|                      |                | Km  |    |    |    |    |    |    |
| PAK6                 | Activity       | app | 14 | 10 | 11 | 14 | 14 |    |
|                      |                | Km  |    |    |    |    |    |    |
| PAK7 (KIAA1264)      | Activity       | app | 8  | 8  | 4  | 10 | 13 |    |
|                      |                | Km  |    |    |    |    |    |    |
| PASK                 | Activity       | app | 2  | 3  | 3  | -2 | 2  |    |
|                      |                | Km  |    |    |    |    |    |    |
| PDGFRA (PDGFR alpha) | Activity       | app | 7  | 3  | 10 | 11 | 9  |    |
|                      |                | Km  |    |    |    |    |    |    |
| PDGFRA D842V         | Activity       | app | 0  | -4 | 3  | 3  | 3  |    |
|                      |                | Km  |    |    |    |    |    |    |
| PDGFRA T674I         | Activity       | app | -1 | 5  | -2 | 20 | 21 |    |
|                      |                | Km  |    |    |    |    |    |    |

|                                      |          |        |    |     |     |     |    |  |  |
|--------------------------------------|----------|--------|----|-----|-----|-----|----|--|--|
|                                      |          | app    |    |     |     |     |    |  |  |
| PDGFRA V561D                         | Activity | Km app | 20 | 15  | 29  | 22  | 15 |  |  |
| PDGFRB (PDGFR beta)                  | Activity | Km app | 12 | -4  | 9   | -2  | -2 |  |  |
| PDK1                                 | Activity | 100    | 3  | 0   | 2   | 18  | 18 |  |  |
| PDK1 Direct                          | Activity | Km app |    |     |     | -1  | 1  |  |  |
| PHKG1                                | Activity | Km app | 6  | 7   | 5   | 5   | 5  |  |  |
| PHKG2                                | Activity | Km app | -1 | 0   | 2   | -9  | -5 |  |  |
| PI4KA (PI4K alpha)                   | Activity | 10     |    |     |     | 1   | -7 |  |  |
| PI4KB (PI4K beta)                    | Activity | Km app |    |     |     | 17  | 14 |  |  |
| PIK3C2A (PI3K-C2 alpha)              | Activity | Km app |    |     |     | -1  | 4  |  |  |
| PIK3C2B (PI3K-C2 beta)               | Activity | 10     |    |     |     | 11  | -1 |  |  |
| PIK3C2B (PI3K-C2 beta)               | Activity | 100    |    |     |     |     |    |  |  |
| PIK3C3 (hVPS34)                      | Activity | Km app |    |     |     | -13 | -9 |  |  |
| PIK3CA/PIK3R1 (p110 alpha/p85 alpha) | Activity | Km app | 0  | -35 | -29 | -14 | -4 |  |  |
| PIK3CD/PIK3R1 (p110 delta/p85 alpha) | Activity | Km app |    |     |     | 13  | 8  |  |  |
| PIK3CG (p110 gamma)                  | Activity | Km app | 12 | 4   | 10  | 10  | -9 |  |  |
| PIM1                                 | Activity | Km app | -4 | -2  | 0   | 1   | 6  |  |  |
| PIM2                                 | Activity | Km app | 1  | 0   | 2   | -8  | -7 |  |  |
| PKN1 (PRK1)                          | Activity | Km app | 8  | 12  | 5   | -7  | 5  |  |  |
| PLK1                                 | Activity | Km app | 5  | 4   | 6   | 1   | -6 |  |  |
| PLK2                                 | Activity | Km app | 7  | 13  | 9   | -3  | 4  |  |  |
| PLK3                                 | Activity | Km app | 16 | 5   | 8   | -6  | -7 |  |  |
| PRKACA (PKA)                         | Activity | Km app | 12 | 41  | 38  | 56  | 53 |  |  |
| PRKCA (PKC alpha)                    | Activity | Km app | 13 | 6   | 8   | -3  | 0  |  |  |

|                         |          |        |    |    |    |    |     |
|-------------------------|----------|--------|----|----|----|----|-----|
| PRKCB1 (PKC beta I)     | Activity | Km app | 5  | 6  | 0  | 7  | 7   |
| PRKCB2 (PKC beta II)    | Activity | Km app | -4 | 1  | -5 | 9  | 7   |
| PRKCD (PKC delta)       | Activity | Km app | 4  | 6  | 9  | -1 | 3   |
| PRKCE (PKC epsilon)     | Activity | Km app | -2 | 2  | 1  | 26 | 30  |
| PRKCG (PKC gamma)       | Activity | Km app | 4  | -2 | 2  | 3  | 6   |
| PRKCH (PKC eta)         | Activity | Km app | 2  | 3  | 4  | 8  | 15  |
| PRKCI (PKC iota)        | Activity | Km app | 11 | 7  | 7  | 13 | 15  |
| PRKCN (PKD3)            | Activity | Km app | 69 | 65 | 72 | 77 | 100 |
| PRKCQ (PKC theta)       | Activity | Km app | 22 | 15 | 17 | 5  | 12  |
| PRKCZ (PKC zeta)        | Activity | Km app | 1  | 5  | -4 | 1  | 3   |
| PRKD1 (PKC mu)          | Activity | Km app | 59 | 56 | 65 | 79 | 102 |
| PRKD2 (PKD2)            | Activity | Km app | 75 | 83 | 83 | 85 | 101 |
| PRKG1                   | Activity | Km app | -1 | 0  | 0  | 7  | 6   |
| PRKG2 (PKG2)            | Activity | Km app | 4  | 6  | 4  | -4 | 0   |
| PRKX                    | Activity | Km app | 4  | 4  | 5  | 1  | 2   |
| PTK2 (FAK)              | Activity | Km app | 20 | 11 | 10 | 12 | 10  |
| PTK2B (FAK2)            | Activity | Km app | 5  | 1  | -2 | 4  | 1   |
| PTK6 (Brk)              | Activity | Km app | 98 | 55 | 87 | 9  | 11  |
| RAF1 (cRAF) Y340D Y341D | Binding  |        |    |    |    | 28 | 22  |
| RAF1 (cRAF) Y340D Y341D | Activity | 100    | 14 | 1  | 10 | 38 | 22  |
| RET                     | Activity | Km app | 79 | 65 | 67 | 47 | 46  |
| RET V804L               | Activity | Km app | 11 | 15 | 10 | 3  | 2   |
| RET Y791F               | Activity | Km app | 84 | 70 | 71 | 55 | 48  |

| <b>RIPK2</b>     | <b>Binding</b> |        |    |    |    | 75  | 57 |
|------------------|----------------|--------|----|----|----|-----|----|
| ROCK1            | Activity       | Km app | -1 | 6  | 0  | 5   | 3  |
| ROCK2            | Activity       | Km app | 3  | 3  | -2 | -13 | -9 |
| ROS1             | Activity       | Km app | 6  | 5  | 1  | 11  | 13 |
| RPS6KA1 (RSK1)   | Activity       | Km app | 1  | 0  | 4  | 4   | 1  |
| RPS6KA2 (RSK3)   | Activity       | Km app | 4  | 3  | 3  | -5  | -6 |
| RPS6KA3 (RSK2)   | Activity       | Km app | 3  | 4  | 2  | 4   | 2  |
| RPS6KA4 (MSK2)   | Activity       | Km app | 25 | 12 | 11 | 3   | 8  |
| RPS6KA5 (MSK1)   | Activity       | Km app | 5  | 2  | 6  | 8   | 10 |
| RPS6KA6 (RSK4)   | Activity       | Km app | 1  | 5  | 6  | 2   | 7  |
| RPS6KB1 (p70S6K) | Activity       | Km app | 4  | 4  | 4  | 0   | -1 |
| SGK (SGK1)       | Activity       | Km app | 0  | 2  | 1  | -9  | -8 |
| SGK2             | Activity       | Km app | 6  | 5  | 0  | -2  | -7 |
| SGKL (SGK3)      | Activity       | Km app | -1 | -1 | -1 | -5  | -3 |
| <b>SLK</b>       | <b>Binding</b> |        |    |    |    | 5   | 5  |
| SNF1LK2          | Activity       | Km app |    |    |    | 9   | 7  |
| SPHK1            | Activity       | Km app |    |    |    | -4  | -2 |
| SPHK2            | Activity       | 10     |    |    |    | -36 | 2  |
| SPHK2            | Activity       | 100    |    |    |    |     |    |
| SRC              | Activity       | Km app | 65 | 27 | 36 | 16  | 7  |
| SRC N1           | Activity       | Km app | 61 | 21 | 28 | 23  | 13 |
| SRMS (Srm)       | Activity       | Km app | 22 | 7  | 11 | 22  | 21 |
| SRPK1            | Activity       | Km app | 5  | 5  | 4  | 6   | 4  |
| SRPK2            | Activity       | Km app | 0  | 0  | 3  | -3  | 1  |

|                       |                 |               |    |    |    |     |    |
|-----------------------|-----------------|---------------|----|----|----|-----|----|
| <b>STK16 (PKL12)</b>  | <b>Binding</b>  |               |    |    | 11 | 3   |    |
| <b>STK17A (DRAK1)</b> | <b>Binding</b>  |               |    |    | 10 | 6   |    |
| <b>STK22B (TSSK2)</b> | <b>Activity</b> | <b>Km app</b> | 2  | 4  | 2  | 6   | 4  |
| <b>STK22D (TSSK1)</b> | <b>Activity</b> | <b>Km app</b> | 5  | 4  | 5  | 0   | 1  |
| <b>STK23 (MSSK1)</b>  | <b>Activity</b> | <b>Km app</b> | 6  | 5  | 6  | 4   | 3  |
| <b>STK24 (MST3)</b>   | <b>Activity</b> | <b>Km app</b> | 22 | 9  | 9  | 0   | 4  |
| <b>STK25 (YSK1)</b>   | <b>Activity</b> | <b>Km app</b> | 11 | 1  | 5  | -2  | -3 |
| <b>STK3 (MST2)</b>    | <b>Activity</b> | <b>Km app</b> | 13 | 4  | 3  | 5   | 8  |
| <b>STK33</b>          | <b>Binding</b>  |               |    |    | 3  | 1   |    |
| <b>STK4 (MST1)</b>    | <b>Activity</b> | <b>Km app</b> | 14 | 8  | 5  | 12  | 18 |
| <b>SYK</b>            | <b>Activity</b> | <b>Km app</b> | 7  | 10 | 4  | -10 | -3 |
| <b>TAOK2 (TAO1)</b>   | <b>Activity</b> | <b>Km app</b> | 3  | -1 | 1  | -4  | 2  |
| <b>TAOK3 (JIK)</b>    | <b>Binding</b>  |               |    |    | 9  | 6   |    |
| <b>TBK1</b>           | <b>Activity</b> | <b>Km app</b> | 7  | 8  | 5  | 9   | 9  |
| <b>TEC</b>            | <b>Binding</b>  |               |    |    | 3  | 3   |    |
| <b>TEK (Tie2)</b>     | <b>Activity</b> | <b>Km app</b> | -2 | 0  | -4 | -5  | 3  |
| <b>TGFBR1 (ALK5)</b>  | <b>Binding</b>  |               |    |    |    |     |    |
| <b>TNK2 (ACK)</b>     | <b>Binding</b>  |               |    |    | 29 | 31  |    |
| <b>TTK</b>            | <b>Binding</b>  |               |    |    | 0  | 0   |    |
| <b>TXK</b>            | <b>Activity</b> | <b>Km app</b> |    |    |    |     |    |
| <b>TYK2</b>           | <b>Activity</b> | <b>Km app</b> | 0  | 0  | 1  | 10  | 10 |
| <b>TYRO3 (RSE)</b>    | <b>Activity</b> | <b>Km app</b> | 9  | 3  | 2  | 24  | 21 |
| <b>WEE1</b>           | <b>Binding</b>  |               |    |    | -3 | -1  |    |
| <b>WNK2</b>           | <b>Binding</b>  |               |    |    | -3 | -4  |    |
| <b>YES1</b>           | <b>Activity</b> | <b>Km app</b> | 54 | 42 | 52 | 42  | 39 |
| <b>ZAK</b>            | <b>Binding</b>  |               |    |    | 1  | 1   |    |

|       |          |           |    |    |    |    |    |
|-------|----------|-----------|----|----|----|----|----|
| ZAP70 | Activity | Km<br>app | -7 | -5 | -6 | 14 | 10 |
|-------|----------|-----------|----|----|----|----|----|

**Supplementary Table S2.** Kinase inhibitor profiling data was provided by SelectScreen® Kinase Profiling Services from Life Technologies. 1µM of each inhibitor (1NA-PP1, 1NM-PP1, 3MB-PP1, 17 and 18) was screened against a panel of several hundred protein kinases in duplicate. The average % activity inhibited is listed for each compound against each kinase.

| <b>Data Collection</b>                          |                                                                                       |                                                                                         |                                                                                        |
|-------------------------------------------------|---------------------------------------------------------------------------------------|-----------------------------------------------------------------------------------------|----------------------------------------------------------------------------------------|
| <b>Structure</b>                                | <b>Src-1NA</b>                                                                        | <b>Src-1NM</b>                                                                          | <b>Src-3MB</b>                                                                         |
| <b>Space Group</b>                              | P212121                                                                               | P1                                                                                      | P1                                                                                     |
| <b>Unit Cell Dimensions</b>                     | a= 50.96,<br>b=72.72 ,<br>c=171.98 ,<br>$\alpha=90$ ,<br>$\beta=90$ , $\gamma$<br>=90 | a=42.3 ,<br>b=62.7 ,<br>c=74.3 ,<br>$\alpha=100.4$ ,<br>$\beta=91.0$ ,<br>$\gamma=90.1$ | a=42.0 ,<br>b=55.8 ,<br>c=63.0 ,<br>$\alpha=90.0$ ,<br>$\beta=90.1$ ,<br>$\gamma=88.9$ |
| <b>Number protein molecules/assymetric unit</b> | 1                                                                                     | 2                                                                                       | 2                                                                                      |
| <b>X-ray Source</b>                             | CHESS A1                                                                              | ALS 5.0.1                                                                               | ALS 5.0.1                                                                              |
| <b>Resolution (Å)</b>                           | 2.3                                                                                   | 2.84                                                                                    | 2.4                                                                                    |
| <b>Total Reflections</b>                        | 101969                                                                                | 16738                                                                                   | 21085                                                                                  |
| <b>Unique Reflections</b>                       | 28882                                                                                 | 16738                                                                                   | 18807                                                                                  |
| <b>Completeness (%)</b>                         | 98.7 (99.6<br>in 2.38-2.3<br>shell)                                                   | 94.7                                                                                    | 95.1                                                                                   |
| <b>Model Refinement</b>                         |                                                                                       |                                                                                         |                                                                                        |
| <b>Resolution (Å)</b>                           | 25-2.3                                                                                | 32.93-2.84                                                                              | 33.87-2.41                                                                             |
| <b>Rwork/Rfree</b>                              | 0.213/0.25                                                                            | 0.230/0.287                                                                             | 0.232/0.281                                                                            |
| <b>Rmsd from ideality in bond length (Å)</b>    | 0.018                                                                                 | 0.008                                                                                   | 0.014                                                                                  |
| <b>Rmsd from ideality in Angles (°)</b>         | 1.38                                                                                  | 1.12                                                                                    | 1.4                                                                                    |
| <b>Number of Protein Atoms In Model</b>         | 3607                                                                                  | 3874                                                                                    | 7685                                                                                   |
| <b>Number of Drug atoms In Model</b>            | 24                                                                                    | 50                                                                                      | 43                                                                                     |

|                                                                      |            |            |            |
|----------------------------------------------------------------------|------------|------------|------------|
| <b>Number of waters</b>                                              | 278        | 37         | 46         |
| <b>Favored/Allowed/Outliers<br/>in the Ramachandran Plot<br/>(%)</b> | 97.3/2.7/0 | 95.6/4.4/0 | 96.6/3.4/0 |

**Supplemental Table S3.** Data collection and refinement statistics for X-ray crystal structures of Src(T338G) in complex with PP inhibitors.

## Supplementary Experimental

### Compound Characterization

**1-*tert*-Butyl-3-(2,3-dimethylphenyl)-1*H*-pyrazolo[3,4-*d*]pyrimidin-4-ylamine (1).**

White powder; <sup>1</sup>H NMR (CDCl<sub>3</sub>, 400 MHz) δ 1.81 (s, 9H), 2.17 (s, 3H), 2.33 (s, 3H), 5.25 (br s, 2H), 7.20 (m, 3H), 8.31 (s, 1H); <sup>13</sup>C NMR (CDCl<sub>3</sub>, 100 MHz) δ 16.5, 20.6, 29.3, 60.3, 100.9, 125.9, 127.9, 130.7, 132.6, 136.2, 138.2, 142.0, 153.7, 154.6, 157.8; HRMS (EI) molecular ion calculated for C<sub>17</sub>H<sub>21</sub>N<sub>5</sub> 295.17970, found 295.17968.

**3-Benzyl-1-*tert*-butyl-1*H*-pyrazolo[3,4-*d*]pyrimidin-4-ylamine (2).** White powder; <sup>1</sup>H

NMR (CDCl<sub>3</sub>, 400 MHz) δ 1.79 (s, 9H), 4.29 (s, 2H), 4.89 (br s, 2H), 7.20 (d, J = 7 Hz, 2H), 7.25 (t, J = 7 Hz, 1H), 7.32 (t, J = 7 Hz, 2H), 8.23 (s, 1H); <sup>13</sup>C NMR (CDCl<sub>3</sub>, 100 MHz) δ 29.2, 35.2, 59.9, 100.7, 127.3, 128.4, 129.4, 138.2, 140.9, 154.5, 154.7, 157.6; HRMS (EI) molecular ion calculated for C<sub>16</sub>H<sub>19</sub>N<sub>5</sub> 281.16405, found 281.16410.

**1-*tert*-Butyl-3-phenethyl-1*H*-pyrazolo[3,4-*d*]pyrimidin-4-ylamine (3).** White powder;

<sup>1</sup>H NMR (CDCl<sub>3</sub>, 400 MHz) δ 1.74 (s, 9H), 3.11 (t, 2H), 3.22 (t, 2H), 6.32 (s, 2H), 7.17 (d, 2H), 7.25 (m, 3H), 8.17 (s, 1H); <sup>13</sup>C NMR (CDCl<sub>3</sub>, 100 MHz) δ 29.2, 31.3, 34.8, 61.1,



99.7, 126.7, 128.5, 128.8, 140.6, 143.2, 147.8, 152.3, 155.1; HRMS (EI) molecular ion calculated for C<sub>17</sub>H<sub>21</sub>N<sub>5</sub> 295.17970, found 295.17888.

**1-*tert*-Butyl-3-cyclopentylmethyl-1*H*-pyrazolo[3,4-*d*]pyrimidin-4-ylamine (4).** White powder; <sup>1</sup>H NMR (CDCl<sub>3</sub>, 400 MHz) δ 1.28 (m, 2H), 1.53 (m, 2H), 1.65 (m, 2H), 1.71 (m, 2H), 1.73 (s, 9H), 2.28 (m, 1H), 2.86 (d, J = 8 Hz, 2H), 5.69 (br s, 2H), 8.25 (s, 1H); <sup>13</sup>C NMR (CDCl<sub>3</sub>, 100 MHz) δ 25.0, 29.2, 32.4, 35.2, 39.7, 59.7, 100.5, 142.1, 153.0, 154.0, 158.0; HRMS (EI) molecular ion calculated for C<sub>15</sub>H<sub>23</sub>N<sub>5</sub> 273.19535, found 273.19565.

**1-*tert*-Butyl-3-(1-phenethyl)-1*H*-pyrazolo[3,4-*d*]pyrimidin-4-ylamine (5).** White powder; <sup>1</sup>H NMR (CDCl<sub>3</sub>, 400 MHz) δ 1.71 (d, J = 7 Hz, 3H), 1.79 (s, 9H), 4.38 (q, J = 7 Hz, 1H), 5.06 (br s, 2H), 7.19 (d, J = 7 Hz, 2H), 7.22 (m, 1H), 7.30 (t, J = 7 Hz, 2H), 8.16 (s, 1H); <sup>13</sup>C NMR (CDCl<sub>3</sub>, 100 MHz) δ 21.0, 29.1, 40.1, 60.0, 100.0, 127.2, 127.4, 129.3, 144.5, 145.2, 153.6, 154.5, 157.3; HRMS (EI) molecular ion calculated for C<sub>17</sub>H<sub>21</sub>N<sub>5</sub> 295.17970, found 295.18043.

**1-*tert*-Butyl-3-(2-methylbenzyl)-1*H*-pyrazolo[3,4-*d*]pyrimidin-4-ylamine (6).** White powder; <sup>1</sup>H NMR (CDCl<sub>3</sub>, 400 MHz) δ 1.77 (s, 9H), 2.30 (s, 3H), 4.25 (s, 2H), 5.09 (br s, 2H), 6.98 (d, J = 8 Hz, 1H), 7.14 (m, 3H), 8.20 (s, 1H); <sup>13</sup>C NMR (CDCl<sub>3</sub>, 100 MHz) δ 19.8, 29.1, 33.1, 59.9, 100.9, 126.7, 127.3, 128.3, 130.8, 136.1, 136.8, 140.6, 154.3, 154.5, 157.8; HRMS (EI) molecular ion calculated for C<sub>17</sub>H<sub>21</sub>N<sub>5</sub> 295.17970, found 295.17922.

**1-*tert*-Butyl-3-(2-chlorobenzyl)-1*H*-pyrazolo[3,4-*d*]pyrimidin-4-ylamine (7).** White powder; <sup>1</sup>H NMR (CDCl<sub>3</sub>, 400 MHz) δ 1.78 (s, 9H), 4.38 (s, 2H), 5.41 (br s, 2H), 7.00 (dd, J<sub>1</sub> = 7 Hz, J<sub>2</sub> = 2 Hz, 1H), 7.15 (m, 2H), 7.39 (dd, J<sub>1</sub> = 8 Hz, J<sub>2</sub> = 2 Hz, 1H), 8.22 (s, 1H); <sup>13</sup>C NMR (CDCl<sub>3</sub>, 100 MHz) δ 29.1, 31.9, 60.0, 100.7, 127.4, 128.4, 129.6, 130.1, 133.3, 135.6, 139.4, 154.4, 154.5, 157.7; HRMS (EI) molecular ion calculated for C<sub>16</sub>H<sub>18</sub>N<sub>5</sub>Cl 315.12507, found 315.12449.

**1-*tert*-Butyl-3-(2-methoxybenzyl)-1*H*-pyrazolo[3,4-*d*]pyrimidin-4-ylamine (8).** White powder; <sup>1</sup>H NMR (CDCl<sub>3</sub>, 400 MHz) δ 1.77 (s, 9H), 3.89 (s, 3H), 4.25 (s, 2H), 5.77 (br s, 2H), 6.89 (m, 2H), 7.18 (m, 2H), 8.20 (s, 1H); <sup>13</sup>C NMR (CDCl<sub>3</sub>, 100 MHz) δ 27.4, 29.2,

55.5, 59.8, 100.4, 110.8, 121.5, 126.5, 128.0, 130.6, 141.1, 154.3, 154.3, 155.7, 158.0; HRMS (EI) molecular ion calculated for C<sub>17</sub>H<sub>21</sub>N<sub>5</sub>O 311.17461, found 311.17545.

**1-*tert*-Butyl-3-(3-methylbenzyl)-1*H*-pyrazolo[3,4-*d*]pyrimidin-4-ylamine (3MB).**

White powder; <sup>1</sup>H NMR (CDCl<sub>3</sub>, 400 MHz) δ 1.79 (s, 9H), 2.29 (s, 3H), 4.24 (s, 2H), 4.95 (br s, 2H), 6.99 (d, J = 7 Hz, 1H), 7.00 (s, 1H), 7.06 (d, J = 8 Hz, 1H), 7.20 (t, J = 8 Hz, 1H), 8.22 (s, 1H); <sup>13</sup>C NMR (CDCl<sub>3</sub>, 100 MHz) δ 21.4, 29.2, 35.1, 59.9, 100.7, 125.4, 128.1, 129.1, 129.1, 138.1, 139.0, 141.1, 154.4, 154.7, 157.7; HRMS (EI) molecular ion calculated for C<sub>17</sub>H<sub>21</sub>N<sub>5</sub> 295.17970, found 295.17981.

**1-(*tert*-butyl)-3-(3-chlorobenzyl)-1*H*-pyrazolo[3,4-*d*]pyrimidin-4-amine (10).**

White powder; <sup>1</sup>H NMR (CDCl<sub>3</sub>, 400 MHz) δ 1.79 (s, 9H), 3.79 (s, 3H), 3.25 (s, 2H), 7.06 (d, 1H), 7.19 (m, 3H), 8.26 (s, 1H); <sup>13</sup>C NMR (CDCl<sub>3</sub>, 100 MHz) δ 29.2, 34.8, 60.1, 77.2, 100.6, 126.4, 127.5, 128.5, 130.4, 135.1, 139.8, 140.2, 154.6, 157.5; HRMS (EI) molecular ion calculated for C<sub>16</sub>H<sub>19</sub>N<sub>5</sub><sup>35</sup>Cl 316.1324, found 316.1314.

**3-(3-Methoxybenzyl)-1-*tert*-butyl-1*H*-pyrazolo[3,4-*d*]pyrimidin-4-ylamine (11).**

White powder; <sup>1</sup>H NMR (CDCl<sub>3</sub>, 400 MHz) δ 1.79 (s, 9H), 3.74 (s, 3H), 4.25 (s, 2H), 4.89 (s, 2H), 6.72 (s, 1H), 6.79 (m, 2H), 7.22 (s, 1H), 8.24 (s, 1H); <sup>13</sup>C NMR (CDCl<sub>3</sub>, 100 MHz) δ 29.4, 35.4, 55.4, 60.1, 100.9, 112.5, 114.7, 120.8, 130.5, 140.1, 141.0, 154.7, 154.9, 157.8, 160.5; HRMS (EI) molecular ion calculated for C<sub>17</sub>H<sub>21</sub>N<sub>5</sub>O 311.1824, found 311.1835.

**1-*tert*-Butyl-3-(4-methylbenzyl)-1*H*-pyrazolo[3,4-*d*]pyrimidin-4-ylamine (12).**

White powder; <sup>1</sup>H NMR (CDCl<sub>3</sub>, 400 MHz) δ 1.79 (s, 9H), 2.30 (s, 3H), 4.24 (s, 2H), 4.94 (br s, 2H), 7.08 (d, J = 8 Hz, 2H), 7.11 (d, J = 8 Hz, 2H), 8.21 (s, 1H); <sup>13</sup>C NMR (CDCl<sub>3</sub>, 100 MHz) δ 21.0, 29.2, 34.8, 59.9, 100.6, 128.3, 130.0, 135.1, 136.9, 141.3, 154.5, 154.7, 157.7; HRMS (EI) molecular ion calculated for C<sub>17</sub>H<sub>21</sub>N<sub>5</sub> 295.17970, found 295.18068.

**1-*tert*-Butyl-3-(4-chlorobenzyl)-1*H*-pyrazolo[3,4-*d*]pyrimidin-4-ylamine (13).**

White powder; <sup>1</sup>H NMR (CDCl<sub>3</sub>, 400 MHz) δ 1.77 (s, 9H), 4.25 (s, 2H), 5.16 (br s, 2H), 7.11 (d, J = 8 Hz, 2H), 7.27 (d, J = 8 Hz, 2H), 8.22 (s, 1H); <sup>13</sup>C NMR (CDCl<sub>3</sub>, 100 MHz) δ 29.1, 34.5, 60.0, 100.6, 129.3, 129.6, 133.1, 136.6, 140.1, 154.5, 154.6, 157.6; HRMS (EI) molecular ion calculated for C<sub>16</sub>H<sub>18</sub>N<sub>5</sub>Cl 315.12507, found 315.12545.

**1-*tert*-Butyl-3-(4-methoxybenzyl)-1*H*-pyrazolo[3,4-*d*]pyrimidin-4-ylamine (14).**

White powder; <sup>1</sup>H NMR (CDCl<sub>3</sub>, 400 MHz) δ 1.78 (s, 9H), 3.76 (s, 3H), 4.22 (s, 2H), 4.91 (br s, 2H), 6.84 (d, J = 9 Hz, 2H), 7.11 (d, J = 9 Hz, 2H), 8.22 (s, 1H); <sup>13</sup>C NMR (CDCl<sub>3</sub>, 100 MHz) δ 29.2, 34.3, 55.2, 59.9, 100.6, 114.6, 129.4, 130.0, 141.4, 154.5, 154.7, 157.6, 158.7; HRMS (EI) molecular ion calculated for C<sub>17</sub>H<sub>21</sub>N<sub>5</sub>O 311.17461, found 311.17454.

**3-(3-Trifluoromethylbenzyl)-1-*tert*-butyl-1*H*-pyrazolo[3,4-*d*]pyrimidin-4-ylamine**

**(15).** White powder; <sup>1</sup>H NMR (CDCl<sub>3</sub>, 400 MHz) δ 1.789 (s, 9H), 4.349 (s, 2H), 4.917 (s, 2H), 7.360 (d, 1H), 7.430 (t, 1H), 7.506 (s, 1H), 7.516 (d, 1H), 8.262 (s, 1H); <sup>13</sup>C NMR (CDCl<sub>3</sub>, 100 MHz) δ 29.144, 34.961, 60.172, 77.205, 100.601, 124.108, 125.042, 129.640, 131.265, 131.652, 139.124, 139.474, 154.646, 154.699, 157.387; ESI-HRMS [MH]<sup>+</sup> calculated for C<sub>17</sub>H<sub>18</sub>F<sub>3</sub>N<sub>5</sub> 350.1587, found 350.1581.

**3-(3-Bromobenzyl)-1-*tert*-butyl-1*H*-pyrazolo[3,4-*d*]pyrimidin-4-ylamine (16).** White

powder; <sup>1</sup>H NMR (CDCl<sub>3</sub>, 400 MHz) δ 1.79 (s, 9H), 4.28 (s, 2H), 5.73 (s, 2H), 7.13 (d, 1H), 7.20 (t, 1H), 7.36 (s, 1H), 7.40 (d, 1H), 8.21 (s, 1H); <sup>13</sup>C NMR (CDCl<sub>3</sub>, 100 MHz) δ 29.2, 34.7, 60.8, 100.1, 123.5, 126.9, 130.7, 130.8, 131.4, 140.0, 141.0, 151.5, 153.8, 156.0; HRMS (EI) molecular ion calculated for C<sub>16</sub>H<sub>18</sub>BrN<sub>5</sub> 359.07456, found 359.07423.

**3-(3-Iodobenzyl)-1-*tert*-butyl-1*H*-pyrazolo[3,4-*d*]pyrimidin-4-ylamine (17).** White

powder; <sup>1</sup>H NMR (CDCl<sub>3</sub>, 400 MHz) δ 1.79 (s, 9H), 4.24 (s, 2H), 4.90 (s, 2H), 7.04 (t, 1H), 7.13 (d, 1H), 7.58 (s, 1H), 7.60 (d, 1H), 8.26 (s, 1H); <sup>13</sup>C NMR (CDCl<sub>3</sub>, 100 MHz) δ 29.4, 34.9, 60.3, 95.4, 100.8, 127.8, 131.0, 136.6, 137.5, 140.0, 140.8, 154.8, 154.9, 157.7; HRMS (EI) molecular ion calculated for C<sub>16</sub>H<sub>18</sub>IN<sub>5</sub> 407.0685, found 407.0705.

**3-(3-Methylthiolbenzyl)-1-*tert*-butyl-1*H*-pyrazolo[3,4-*d*]pyrimidin-4-ylamine (18).**

White powder; <sup>1</sup>H NMR (CDCl<sub>3</sub>, 400 MHz) δ 1.791 (s, 9H), 2.414 (s, 3H), 4.250 (s, 2H), 4.886 (s, 2H), 6.937 (d, 1H), 7.097 (s, 1H), 7.123 (d, 1H), 7.225 (t, 1H), 8.243 (s, 1H); <sup>13</sup>C NMR (CDCl<sub>3</sub>, 100 MHz) δ 15.567, 29.190, 35.105, 60.013, 77.205, 100.685, 124.924, 125.076, 126.283, 129.602, 138.942, 139.853, 140.468, 154.585, 154.767, 157.585; HRMS (EI) [MH]<sup>+</sup> calculated for C<sub>17</sub>H<sub>21</sub>N<sub>5</sub>S 328.1577, found 328.1583.

**1-tert-Butyl-3-(2,3-dimethylbenzyl)-1H-pyrazolo[3,4-d]pyrimidin-4-ylamine (19).**

White powder; <sup>1</sup>H NMR (CDCl<sub>3</sub>, 400 MHz) δ 1.78 (s, 9H), 2.19 (s, 3H), 2.28 (s, 3H), 4.28 (s, 2H), 4.86 (s, 2H), 6.88 (d, 1H), 7.02 (t, 1H), 7.08 (d, 1H), 8.23 (s, 1H); <sup>13</sup>C NMR (CDCl<sub>3</sub>, 100 MHz) δ 15.3, 20.6, 29.2, 34.0, 59.9, 100.9, 126.1, 126.3, 129.2, 135.7, 136.0, 137.8, 141.1, 154.4, 154.6, 157.7; HRMS (EI) molecular ion calculated for C<sub>18</sub>H<sub>23</sub>N<sub>5</sub> 309.19535, found 309.19515.

**1-tert-Butyl-3-(3,4-dimethylbenzyl)-1H-pyrazolo[3,4-d]pyrimidin-4-ylamine (20).**

White powder; <sup>1</sup>H NMR (CDCl<sub>3</sub>, 400 MHz) δ 1.79 (s, 9H), 2.20 (s, 3H), 2.21 (s, 3H), 4.21 (s, 2H), 5.45 (s, 2H), 6.91 (d, 1H), 6.96 (s, 1H), 7.07 (d, 1H), 8.18 (s, 1H); <sup>13</sup>C NMR (CDCl<sub>3</sub>, 100 MHz) δ 19.4, 19.8, 29.2, 34.8, 60.4, 100.2, 125.7, 129.6, 130.6, 135.0, 136.0, 137.9, 142.4, 151.5, 153.9, 156.4; HRMS (EI) molecular ion calculated for C<sub>18</sub>H<sub>23</sub>N<sub>5</sub> 309.19535, found 309.19542.

**1-tert-Butyl-3-(2,5-dimethylbenzyl)-1H-pyrazolo[3,4-d]pyrimidin-4-ylamine (21).**

White powder; <sup>1</sup>H NMR (CDCl<sub>3</sub>, 400 MHz) δ 1.79 (s, 9H), 2.20 (s, 3H), 2.25 (s, 3H), 4.22 (s, 2H), 4.94 (s, 2H), 6.81 (s, 1H), 6.98 (d, 1H), 7.08 (d, 1H), 8.23 (s, 1H); <sup>13</sup>C NMR (CDCl<sub>3</sub>, 100 MHz) δ 19.3, 21.0, 29.2, 33.1, 59.9, 100.9, 128.1, 129.1, 130.9, 133.6, 135.9, 136.3, 140.9, 154.3, 154.6, 157.7; HRMS (EI) molecular ion calculated for C<sub>18</sub>H<sub>23</sub>N<sub>5</sub> 309.19535, found 309.19386.

**1-tert-Butyl-3-(3,5-dimethylbenzyl)-1H-pyrazolo[3,4-d]pyrimidin-4-ylamine (22).**

White powder; <sup>1</sup>H NMR (CDCl<sub>3</sub>, 400 MHz) δ 1.80 (s, 9H), 2.25 (s, 6H), 4.20 (s, 2H), 5.00 (s, 2H), 6.80 (s, 2H), 6.88 (s, 1H), 8.22 (s, 1H); <sup>13</sup>C NMR (CDCl<sub>3</sub>, 100 MHz) δ 21.3, 29.2, 35.1, 59.9, 100.7, 126.2, 129.0, 138.0, 138.9, 141.3, 154.4, 154.7, 157.7; HRMS (EI) molecular ion calculated for C<sub>18</sub>H<sub>23</sub>N<sub>5</sub> 309.19535, found 309.19439.

**1-tert-Butyl-3-(3,4-dichlorobenzyl)-1H-pyrazolo[3,4-d]pyrimidin-4-ylamine (23).**

White powder; <sup>1</sup>H NMR (CDCl<sub>3</sub>, 400 MHz) δ 1.79 (s, 9H), 4.24 (s, 2H), 5.07 (s, 2H), 7.02 (dd, 1H), 7.29 (d, 1H), 7.37 (d, 1H), 8.26 (s, 1H); <sup>13</sup>C NMR (CDCl<sub>3</sub>, 100 MHz) δ 29.1, 34.3, 60.2, 100.6, 127.6, 130.2, 131.0, 131.4, 133.2, 138.4, 139.2, 154.6, 154.7, 157.5; HRMS (EI) molecular ion calculated for C<sub>16</sub>H<sub>17</sub>N<sub>5</sub>Cl<sub>2</sub> 349.08610, found 349.08621.

### **Kinase inhibition assays *in vitro***

**Fyn Kinase.** Glutathione S-transferase (GST) fused Fyn proteins were expressed in *E. coli* and purified on glutathione beads as described previously<sup>35</sup>. In the Fyn kinase assay, various concentrations of inhibitor were incubated with 50 mM Tris (pH 8.0), 10 mM MgCl<sub>2</sub>, 1.6 mM glutathione, 1 mg/mL BSA, 0.1 mg/mL peptide substrate (IYGEFKKK), 3.3% DMSO, and 11 nM (2 μCi) [ $\gamma$ -<sup>32</sup>P]ATP (6000 Ci/mmol, NEN), and Fyn kinase in a total volume of 30 μL for 30 min. Reaction mixtures (27 μL) were spotted onto a phosphocellulose disk, and washed with 0.5% H<sub>3</sub>PO<sub>4</sub>. The transfer of <sup>32</sup>P was measured by standard scintillation counting. IC<sub>50</sub> values were defined to be the concentration of inhibitor at which the radioactivity counts remaining on the phosphocellulose disk were inhibited by 50%.

**Src Kinase.** 6xHis-tagged Src (257-533) was expressed in BL-21 *ecoli* cells as previously described<sup>72</sup>. Kinase reaction was carried out as described for Fyn kinase above.

**CK1δ and CK1ε.** Casein Kinase 1δ (catalog # PV3665) and Casein Kinase 1ε (catalog # PV3500) were purchased from Life Technologies and assayed under the following conditions: 50mM TRIS (pH 8.0), 10mM MgCl<sub>2</sub>, 0.4 mg/mL casein, 2.5 mM DTT, 2% DMSO, 5nM kinase, 100μM ATP, 0.1 mg/mL BSA, 1μCi <sup>32</sup>P-ATP and various concentrations of inhibitors.

**PKD1 and PKD2.** PKD1 (catalog # PV3791) and PKD2 (catalog # PV3758) were purchased from Life Technologies and assayed under the following conditions: 50 mM TRIS (pH 8.0), 10 mM MgCl<sub>2</sub>, 2mM DTT, 2% DTT, 0.1 mg/mL BSA, 100 μM ATP, 3 μCi <sup>32</sup>P-ATP, 7 nM kinase and various concentrations of inhibitors.

**RET and ACK.** RET (catalog # PV3819) and ACK (catalog # PV4807) were purchase from Life Technologies and assayed under the following conditions: 50 mM TRIS (pH 8.0), 10 mM MgCl<sub>2</sub>, 2 mM DTT, 0.1 mg/mL BSA, 2% DMSO, 200 μM Abltide, 10 nM kinase, 100 μM ATP, 1μCi <sup>32</sup>P-ATP and variable concentrations of inhibitors.

**EPHA1 and PTK6.** EPHA1 (catalog # 3841) and PTK6 (catalog # 3291) were purchased from Life Technologies and assayed under the following conditions: 50 mM TRIS (pH 8.0), 10 mM MgCl<sub>2</sub>, 2.5 mM DTT, 0.1 mg/mL BSA, 2% DMSO, 0.2 mg/mL poly[Glu, Tyr] 4:1, 2 nM kinase, 100 μM ATP, 1 μCi <sup>32</sup>P-ATP and variable concentrations of inhibitors.

1. Carroll, A. S., Bishop, A. C., DeRisi, J. L., Shokat, K. M. & O'Shea, E. K. Chemical inhibition of the Pho85 cyclin-dependent kinase reveals a role in the environmental stress response. *Proceedings of the National Academy of Sciences* **98**, 12578–12583 (2001).
2. Kung, C., Kenski, D. M., Krukenberg, K., Madhani, H. D. & Shokat, K. M. Selective kinase inhibition by exploiting differential pathway sensitivity. *Chem. Biol.* **13**, 399–407 (2006).
3. Sreenivasan, A., Bishop, A. C., Shokat, K. M. & Kellogg, D. R. Specific inhibition of Elm1 kinase activity reveals functions required for early G1 events. *Mol. Cell Biol.* **23**, 6327–6337 (2003).
4. Liu, Y. *et al.* Two cyclin-dependent kinases promote RNA polymerase II transcription and formation of the scaffold complex. *Mol. Cell Biol.* **24**, 1721–1735 (2004).
5. Drubin, D. G., Weiss, E. L., Bishop, A. C. & Shokat, K. M. Chemical genetic analysis of the budding-yeast p21-activated kinase Cla4p. *Nat. Cell Biol.* **2**, 677–685 (2000).
6. D'Aquino, K. E. *et al.* The protein kinase Kin4 inhibits exit from mitosis in response to spindle position defects. *Mol. Cell* **19**, 223–234 (2005).
7. Shokat, K. M. *et al.* A chemical switch for inhibitor-sensitive alleles of any protein kinase. *Nature* **407**, 395–401 (2000).
8. Jones, M. H., Huneycutt, B. J., Pearson, C. G. & Zhang, C. Chemical genetics reveals a role for Mps1 kinase in kinetochore attachment during mitosis. *Current ...* (2005).
9. Pinsky, B. A., Kung, C., Shokat, K. M. & Biggins, S. The Ipl1-Aurora protein kinase activates the spindle checkpoint by creating unattached kinetochores. *Nat. Cell Biol.* **8**, 78–83 (2006).
10. Benjamin, K. R., Zhang, C., Shokat, K. M. & Herskowitz, I. Control of landmark events in meiosis by the CDK Cdc28 and the meiosis-specific kinase Ime2. *Genes Dev.* **17**, 1524–1539 (2003).
11. Niu, H. *et al.* Regulation of meiotic recombination via Mek1-mediated Rad54 phosphorylation. *Mol. Cell* **36**, 393–404 (2009).
12. Wan, L., de los Santos, T., Zhang, C., Shokat, K. & Hollingsworth, N. M. Mek1 kinase activity functions downstream of RED1 in the regulation of meiotic double

- strand break repair in budding yeast. (2004).
13. Papa, F. R., Zhang, C., Shokat, K. & Walter, P. Bypassing a kinase activity with an ATP-competitive drug. *Science* **302**, 1533–1537 (2003).
  14. Sekiya-Kawasaki, M. *et al.* Dynamic phosphoregulation of the cortical actin cytoskeleton and endocytic machinery revealed by real-time chemical genetic analysis. *J. Cell Biol.* **162**, 765–772 (2003).
  15. Abeliovich, H., Zhang, C., Dunn, W. A., Shokat, K. M. & Klionsky, D. J. Chemical genetic analysis of Apg1 reveals a non-kinase role in the induction of autophagy. *Mol. Biol. Cell* **14**, 477–490 (2003).
  16. Weiss, E. L. The *Saccharomyces cerevisiae* Mob2p-Cbk1p kinase complex promotes polarized growth and acts with the mitotic exit network to facilitate daughter cell-specific localization of Ace2p transcription factor. *J. Cell Biol.* **158**, 885–900 (2002).
  17. Kurischko, C. *et al.* The yeast LATS/Ndr kinase Cbk1 regulates growth via Golgi-dependent glycosylation and secretion. *Mol. Biol. Cell* **19**, 5559–5578 (2008).
  18. Westfall, P. J. & Thorner, J. Analysis of mitogen-activated protein kinase signaling specificity in response to hyperosmotic stress: use of an analog-sensitive HOG1 allele. *Eukaryotic Cell* **5**, 1215–1228 (2006).
  19. Klein, M. *et al.* Design, synthesis and characterization of a highly effective inhibitor for analog-sensitive (as) kinases. *PLoS ONE* **6**, e20789 (2011).
  20. Ramachandran, V. & Herman, P. K. Antagonistic interactions between the cAMP-dependent protein kinase and Tor signaling pathways modulate cell growth in *Saccharomyces cerevisiae*. *Genetics* **187**, 441–454 (2011).
  21. Ramachandran, V., Shah, K. H. & Herman, P. K. The cAMP-dependent protein kinase signaling pathway is a key regulator of P body foci formation. *Mol. Cell* **43**, 973–981 (2011).
  22. Stephan, J. S., Yeh, Y.-Y., Ramachandran, V., Deminoff, S. J. & Herman, P. K. The Tor and cAMP-dependent protein kinase signaling pathways coordinately control autophagy in *Saccharomyces cerevisiae*. *Autophagy* **6**, 294–295 (2010).
  23. Budhwar, R., Lu, A. & Hirsch, J. P. Nutrient control of yeast PKA activity involves opposing effects on phosphorylation of the Bcy1 regulatory subunit. *Mol. Biol. Cell* **21**, 3749–3758 (2010).
  24. Yorimitsu, T., Zaman, S., Broach, J. R. & Klionsky, D. J. Protein kinase A and Sch9 cooperatively regulate induction of autophagy in *Saccharomyces cerevisiae*. *Mol. Biol. Cell* **18**, 4180–4189 (2007).
  25. Lee, J., Moir, R. D. & Willis, I. M. Regulation of RNA polymerase III transcription involves SCH9-dependent and SCH9-independent branches of the target of rapamycin (TOR) pathway. *J. Biol. Chem.* **284**, 12604–12608 (2009).
  26. Rubenstein, E. M. *et al.* Access denied: Snf1 activation loop phosphorylation is controlled by availability of the phosphorylated threonine 210 to the PP1 phosphatase. *J. Biol. Chem.* **283**, 222–230 (2008).
  27. Wan, L., Zhang, C., Shokat, K. M. & Hollingsworth, N. M. Chemical inactivation of cdc7 kinase in budding yeast results in a reversible arrest that allows efficient cell synchronization prior to meiotic recombination. *Genetics* **174**, 1767–1774 (2006).
  28. Zhang, C. *et al.* A second-site suppressor strategy for chemical genetic analysis of

- diverse protein kinases. *Nat. Methods* **2**, 435–441 (2005).
29. Snead, J. L. *et al.* A coupled chemical-genetic and bioinformatic approach to Polo-like kinase pathway exploration. *Chem. Biol.* **14**, 1261–1272 (2007).
  30. Young, E. T., Zhang, C., Shokat, K. M., Parua, P. K. & Braun, K. A. The AMP-activated protein kinase Snf1 regulates transcription factor binding, RNA polymerase II activity, and mRNA stability of glucose-repressed genes in *Saccharomyces cerevisiae*. *J. Biol. Chem.* **287**, 29021–29034 (2012).
  31. Shirra, M. K. *et al.* A chemical genomics study identifies Snf1 as a repressor of GCN4 translation. *J. Biol. Chem.* **283**, 35889–35898 (2008).
  32. Liu, Y. *et al.* Phosphorylation of the transcription elongation factor Spt5 by yeast Bur1 kinase stimulates recruitment of the PAF complex. *Mol. Cell. Biol.* **29**, 4852–4863 (2009).
  33. Cipak, L. *et al.* Generation of a set of conditional analog-sensitive alleles of essential protein kinases in the fission yeast *Schizosaccharomyces pombe*. *Cell Cycle* **10**, 3527–3532 (2011).
  34. Hauf, S. *et al.* Aurora controls sister kinetochore mono-orientation and homolog bi-orientation in meiosis-I. *EMBO J* **26**, 4475–4486 (2007).
  35. Bishop, A. C., Kung, C., Shah, K. & Witucki, L. Generation of monospecific nanomolar tyrosine kinase inhibitors via a chemical genetic approach. *Journal of the ...* (1999).
  36. Schoenborn, J. R., Tan, Y. X., Zhang, C., Shokat, K. M. & Weiss, A. Feedback circuits monitor and adjust basal Lck-dependent events in T cell receptor signaling. *Sci Signal* **4**, ra59 (2011).
  37. Denzel, A. *et al.* Cutting Edge: A Chemical Genetic System for the Analysis of Kinases Regulating T Cell Development. *The Journal of ...* (2003).
  38. Chen, X. *et al.* A chemical-genetic approach to studying neurotrophin signaling. *Neuron* **46**, 13–21 (2005).
  39. Wong, S. Sole BCR-ABL inhibition is insufficient to eliminate all myeloproliferative disorder cell populations. *Proceedings of the National Academy of Sciences* **101**, 17456–17461 (2004).
  40. Fan, Q.-W., Zhang, C., Shokat, K. M. & Weiss, W. A. Chemical genetic blockade of transformation reveals dependence on aberrant oncogenic signaling. *Curr. Biol.* **12**, 1386–1394 (2002).
  41. Haan, C., Rolvering, C., Raulf, F., Kapp, M. & Drückes, P. Jak1 has a dominant role over Jak3 in signal transduction through  $\gamma$ c-containing cytokine receptors. *Chem. Biol.* (2011).
  42. Au-Yeung, B. B. *et al.* A genetically selective inhibitor demonstrates a function for the kinase Zap70 in regulatory T cells independent of its catalytic activity. *Nat. Immunol.* **11**, 1085–1092 (2010).
  43. Miller, A. L., Zhang, C., Shokat, K. M. & Lowell, C. A. Generation of a novel system for studying spleen tyrosine kinase function in macrophages and B cells. *J. Immunol.* **182**, 988–998 (2009).
  44. Soskis, M. J. *et al.* A chemical genetic approach reveals distinct EphB signaling mechanisms during brain development. *Nat. Neurosci.* **15**, 1645–1654 (2012).
  45. Savitt, J. *et al.* The in vivo response of stem and other undifferentiated spermatogonia to the reversible inhibition of glial cell line-derived neurotrophic



- factor signaling in the adult. *Stem Cells* **30**, 732–740 (2012).
46. Su, T. *et al.* A kinase cascade leading to Rab11-FIP5 controls transcytosis of the polymeric immunoglobulin receptor. *Nat. Cell Biol.* **12**, 1143–1153 (2010).
  47. Gravells, P., Tomita, K., Booth, A., Poznansky, J. & Porter, A. C. G. Chemical genetic analyses of quantitative changes in Cdk1 activity during the human cell cycle. *Human Molecular Genetics* (2013). doi:10.1093/hmg/ddt133
  48. Merrick, K. A. *et al.* Switching Cdk2 On or Off with Small Molecules to Reveal Requirements in Human Cell Proliferation. *Mol. Cell* **42**, 624–636 (2011).
  49. Merrick, K. A. *et al.* Distinct activation pathways confer cyclin-binding specificity on Cdk1 and Cdk2 in human cells. *Mol. Cell* **32**, 662–672 (2008).
  50. Niswender, C. M. *et al.* Protein engineering of protein kinase A catalytic subunits results in the acquisition of novel inhibitor sensitivity. *J. Biol. Chem.* **277**, 28916–28922 (2002).
  51. Qi, Z.-H. *et al.* Protein kinase C epsilon regulates gamma-aminobutyrate type A receptor sensitivity to ethanol and benzodiazepines through phosphorylation of gamma2 subunits. *J. Biol. Chem.* **282**, 33052–33063 (2007).
  52. Kenski, D. M., Zhang, C., Zastrow, von, M. & Shokat, K. M. Chemical genetic engineering of G protein-coupled receptor kinase 2. *J. Biol. Chem.* **280**, 35051–35061 (2005).
  53. Das, M. *et al.* Suppression of p53-dependent senescence by the JNK signal transduction pathway. *Proc. Natl. Acad. Sci. U.S.A.* **104**, 15759–15764 (2007).
  54. Jaeschke, A. *et al.* JNK2 is a positive regulator of the cJun transcription factor. *Mol. Cell* **23**, 899–911 (2006).
  55. Wei, F. *et al.* Forebrain overexpression of CaMKII abolishes cingulate long term depression and reduces mechanical allodynia and thermal hyperalgesia. *Mol Pain* **2**, 21 (2006).
  56. Wang, H. *et al.* Inducible protein knockout reveals temporal requirement of CaMKII reactivation for memory consolidation in the brain. *Proc. Natl. Acad. Sci. U.S.A.* **100**, 4287–4292 (2003).
  57. Lin, J. H. *et al.* IRE1 signaling affects cell fate during the unfolded protein response. *Science* **318**, 944–949 (2007).
  58. Burkard, M. E. *et al.* Chemical genetics reveals the requirement for Polo-like kinase 1 activity in positioning RhoA and triggering cytokinesis in human cells. *Proc. Natl. Acad. Sci. U.S.A.* **104**, 4383–4388 (2007).
  59. Burkard, M. E. *et al.* Plk1 self-organization and priming phosphorylation of HsCYK-4 at the spindle midzone regulate the onset of division in human cells. *PLoS Biol.* **7**, e1000111 (2009).
  60. Maciejowski, J. *et al.* Mps1 directs the assembly of Cdc20 inhibitory complexes during interphase and mitosis to control M phase timing and spindle checkpoint signaling. *J. Cell Biol.* **190**, 89–100 (2010).
  61. Sliedrecht, T., Zhang, C., Shokat, K. M. & Kops, G. J. P. L. Chemical genetic inhibition of Mps1 in stable human cell lines reveals novel aspects of Mps1 function in mitosis. *PLoS ONE* **5**, e10251 (2010).
  62. Lo, B. *et al.* Lkb1 regulates organogenesis and early oncogenesis along AMPK-dependent and -independent pathways. *The Journal of cell ...* (2012).
  63. Okuzumi, T. *et al.* Inhibitor hijacking of Akt activation. *Nat. Chem. Biol.* **5**, 484–

- 493 (2009).
64. Okuzumi, T. *et al.* Synthesis and evaluation of indazole based analog sensitive Akt inhibitors. *Mol Biosyst* **6**, 1389–1402 (2010).
  65. Tamgüney, T., Zhang, C., Fiedler, D., Shokat, K. & Stokoe, D. Analysis of 3-phosphoinositide-dependent kinase-1 signaling and function in ES cells. *Experimental Cell Research* **314**, 2299–2312 (2008).
  66. Hengeveld, R. C. C. *et al.* Development of a Chemical Genetic Approach for Human Aurora B Kinase Identifies Novel Substrates of the Chromosomal Passenger Complex. *Mol. Cell Proteomics* **11**, 47–59 (2012).
  67. Ultanir, S. K. *et al.* Chemical genetic identification of NDR1/2 kinase substrates AAK1 and Rabin8 Uncovers their roles in dendrite arborization and spine development. *Neuron* **73**, 1127–1142 (2012).
  68. Brodersen, P. *et al.* Arabidopsis MAP kinase 4 regulates salicylic acid- and jasmonic acid/ethylene-dependent responses via EDS1 and PAD4. *Plant J.* **47**, 532–546 (2006).
  69. Salomon, D. *et al.* Bypassing kinase activity of the tomato Pto resistance protein with small molecule ligands. *J. Biol. Chem.* **284**, 15289–15298 (2009).
  70. Salomon, D., Zhang, C., Shokat, K. M. & Sessa, G. Sensitizing plant protein kinases to specific inhibition by ATP-competitive molecules. *Methods Mol. Biol.* **779**, 185–197 (2011).
  71. Kim, J. S. M. *et al.* A chemical-genetic strategy reveals distinct temporal requirements for SAD-1 kinase in neuronal polarization and synapse formation. *Neural Dev* **3**, 23 (2008).
  72. Seeliger, M. A. *et al.* High yield bacterial expression of active c-Abl and c-Src tyrosine kinases. *Protein Sci.* **14**, 3135–3139 (2005).
